# Supplementary material
Source: PubMed Central journal article supplement (PMC3109715)

**Table S1. Primer sequences used in qRT-PCR**

| <b>Gene</b>        | <b>Primer sequence (5' to 3')</b> |
|--------------------|-----------------------------------|
| LGALS1 (sense)     | CTCCTGACGCTAAGAGCTTCG             |
| LGALS1 (antisense) | CCAGGCTGGAAGGGAAAGAC              |
| SOX5 (sense)       | CCCTTGCATGTGAGTTTTCCC             |
| SOX5 (antisense)   | TGCCTTCTGAGGTGAGGTAGA             |
| FGR (sense)        | GGCAGCAGACCACTATGG                |
| FGR (antisense)    | GCCACTATCAAGGAAGCCAGG             |
| CD11c (sense)      | GGAGTGCCCAAGACAGGAG               |
| CD11c (antisense)  | GGAAGTGGCTTATCACAGCTCT            |
| OAS1 (sense)       | GATCTCAGAAATACCCAGCCA             |
| OAS1 (antisense)   | AGCTACCTCGGAAGCACCTT              |
| FCRL4 (sense)      | TCAGCTGGGAGAAGAAGAGGAA            |
| FCRL4 (antisense)  | GAGTTATCTGGGTGTTGTGTCTTTACC       |
| FCRL4 (sense)      | ATGGACCACATTCTTCAAAGGAG           |
| FCRL4 (antisense)  | CCCAGTAGTGCCGATGATACC             |
| IL4R (sense)       | CCGCCTCGTGGCTATAATAATC            |
| IL4R (antisense)   | GGCAGCCTTGTGAGGATCTT              |
| TCL1A (sense)      | GCTGCCCTTAACCATCGAGAT             |
| TCL1A (antisense)  | CAGCAGGCTTGGGCCTATC               |
| EBNA 2 (sense)     | TTAGAGAGTGGCTGCTACGCATT           |
| EBNA 2 (antisense) | AGTGCTGGGTACTGGCTAAGC             |

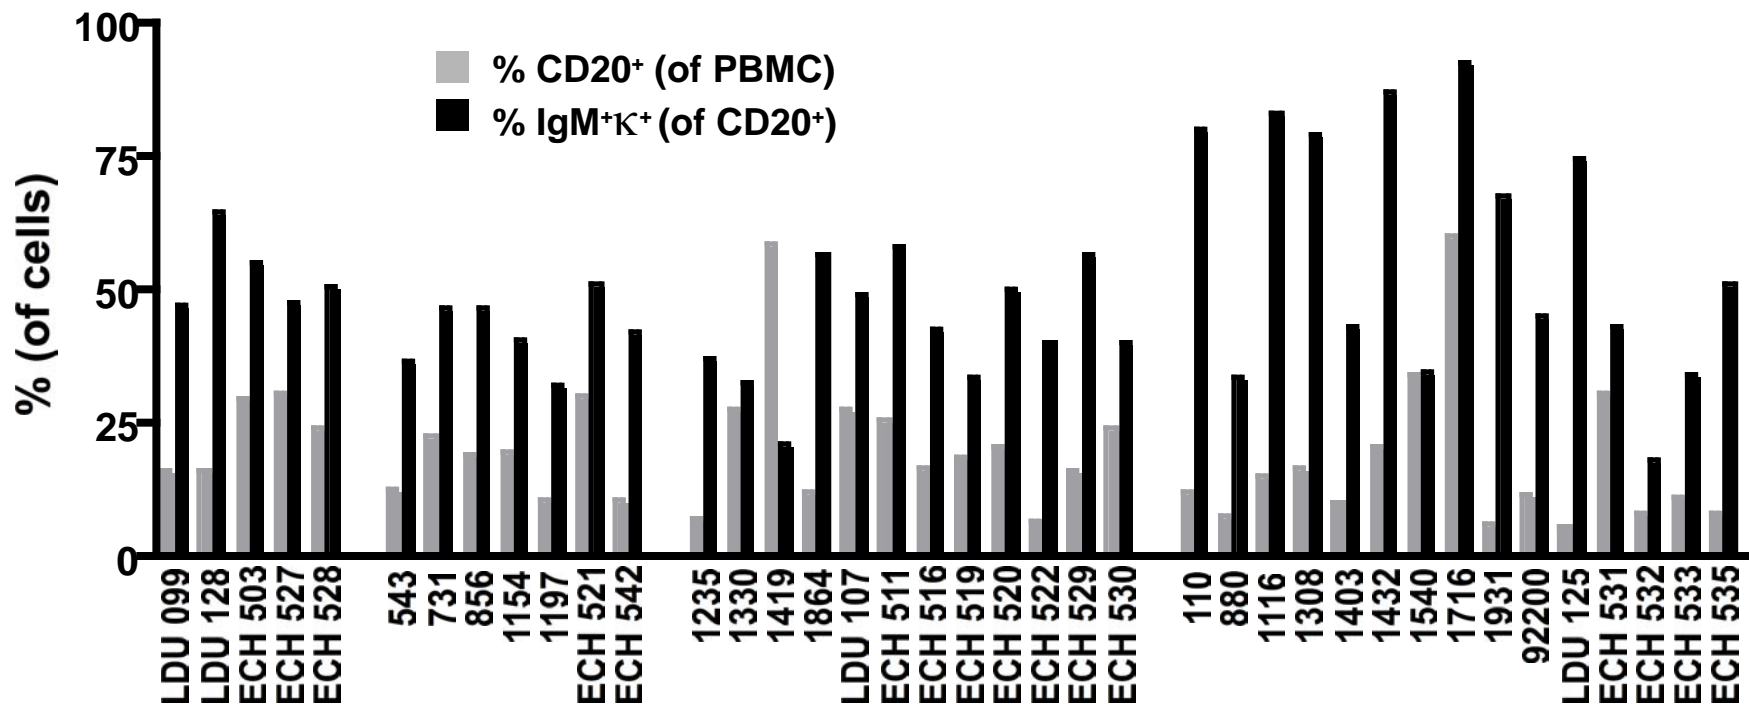

**Figure S1.** Percentages of CD20<sup>+</sup> and IgM<sup>+</sup>κ<sup>+</sup> B cells among PBMCs from healthy individuals, sustained virologic responders, HCV<sup>+</sup>MC<sup>-</sup> patients, and HCV<sup>+</sup>MC<sup>+</sup> patients. Gray bars represent percentages of CD20<sup>+</sup> PBMCs. Black bars depict percentages of B cells that are IgM<sup>+</sup>κ<sup>+</sup>.

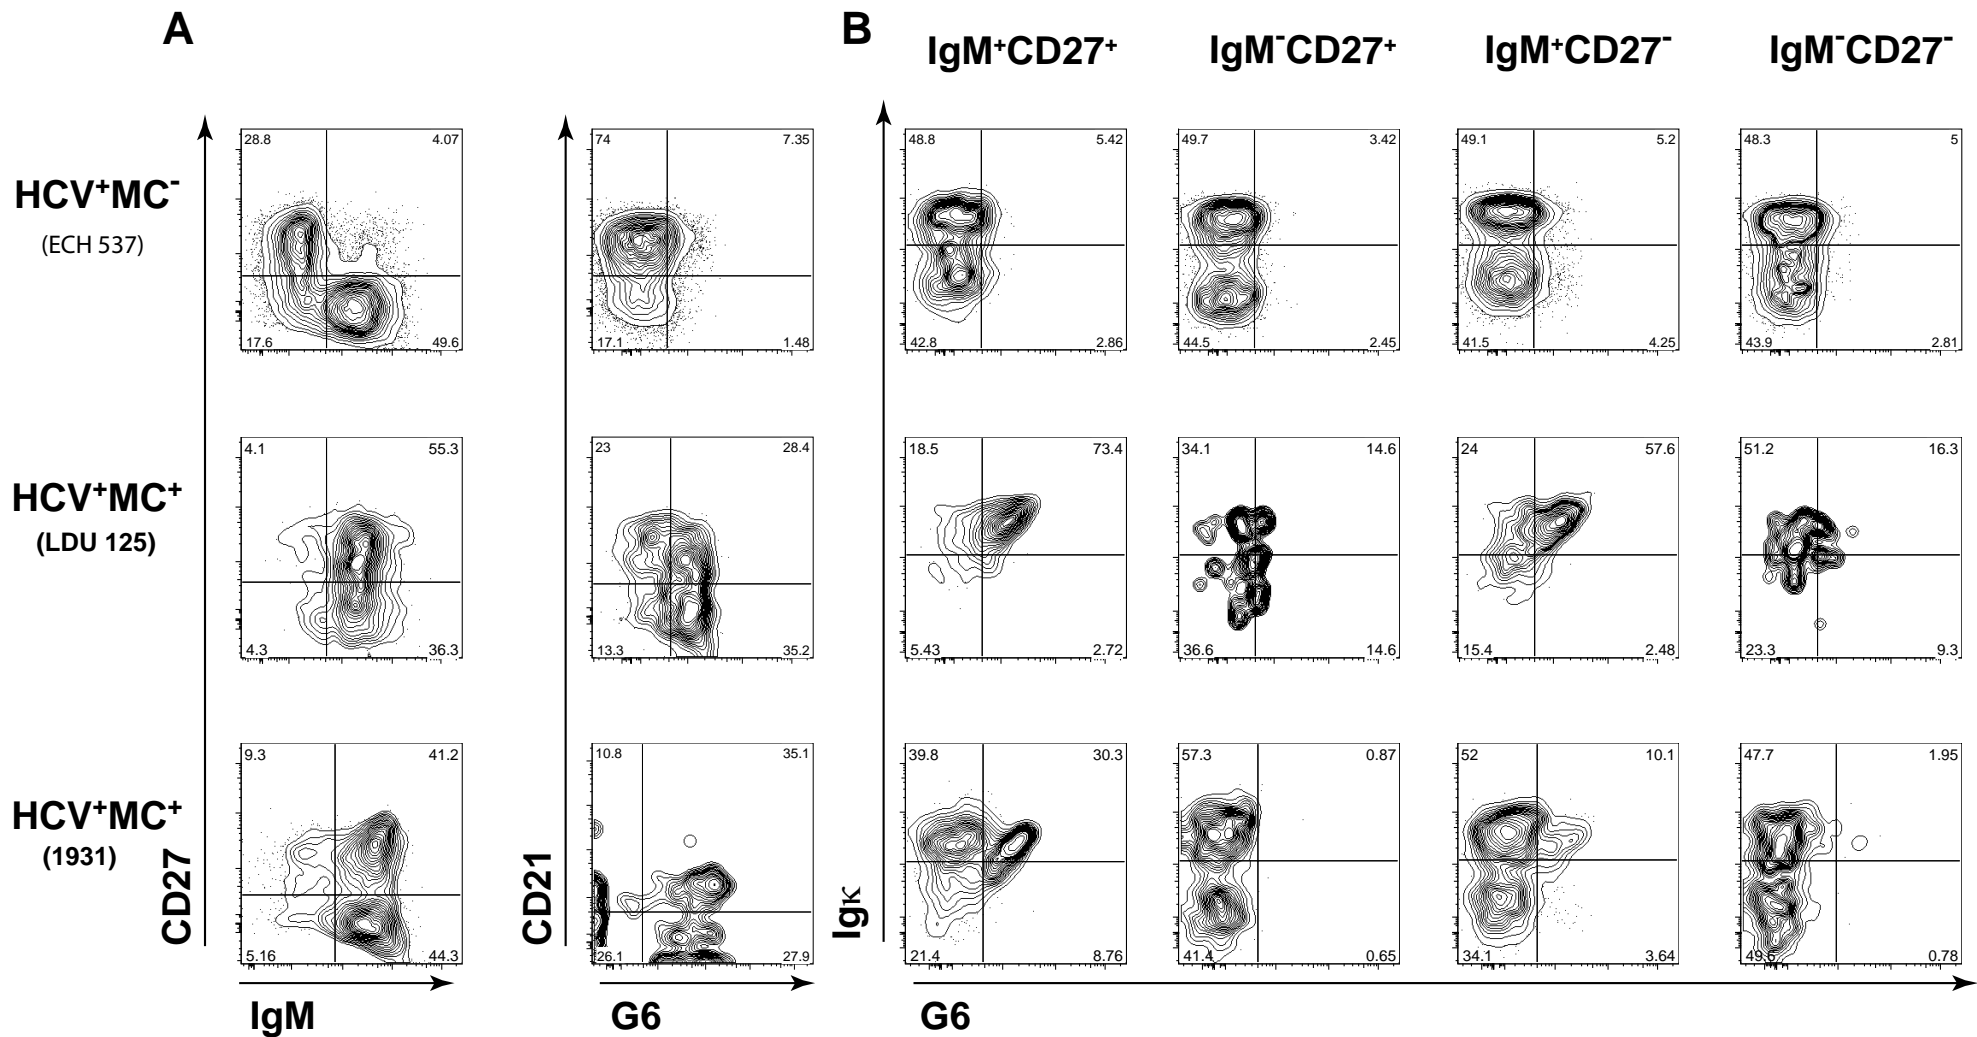

**Figure S2.** HCV<sup>+</sup>MC<sup>+</sup> patients' G6<sup>+</sup> B cells have increased proportions of CD21<sup>low</sup> and IgM<sup>+</sup>κ<sup>+</sup>CD27<sup>+</sup> cells. B cell surface IgM, CD27, CD21 and G6 staining (A). Surface Igκ and G6 staining of IgM<sup>+/−</sup> CD27<sup>+/−</sup> B cell subsets (B). Analysis of CD20<sup>+</sup> PBMCs from one HCV<sup>+</sup>MC<sup>-</sup> individual (ECH 537) and two MC<sup>+</sup> patients (LDU 125 and 1931) are shown.

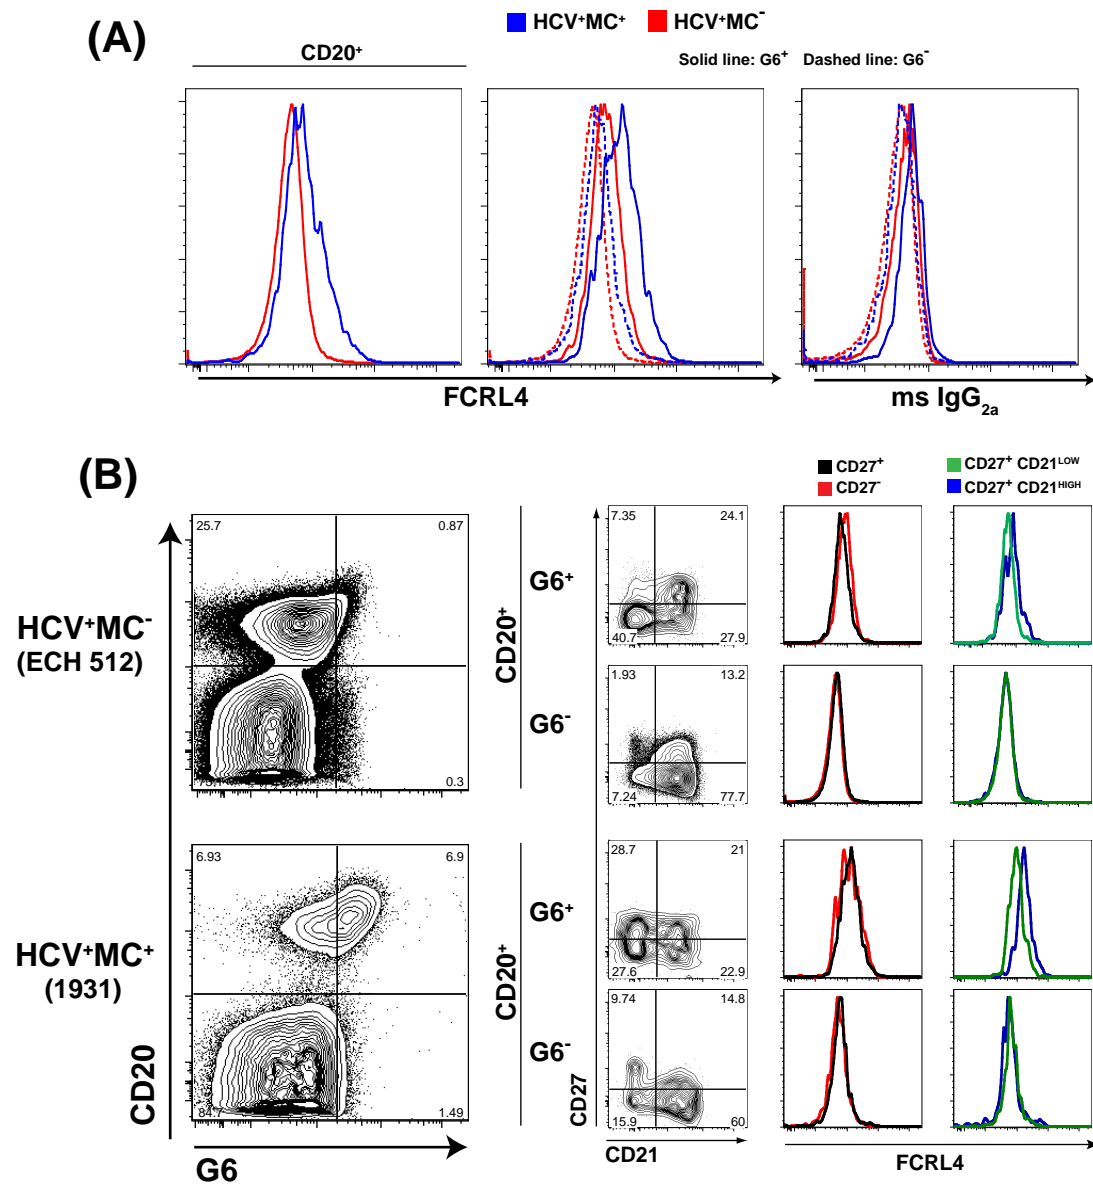

**Figure S3.** HCV<sup>+</sup>MC<sup>+</sup> patients' G6<sup>+</sup> B cells have upregulated FCRL4 expression that does not significantly vary with CD27 or CD21 expression. Analyses of PBMCs from one representative one HCV<sup>+</sup>MC<sup>-</sup> (ECH 512) and one HCV<sup>+</sup>MC<sup>+</sup> patient (1931) (out of a total of six each) are shown. FCRL4 expression for total, G6<sup>+</sup>, and G6<sup>-</sup> B cells. Mouse IgG2a isotype control is shown in the right panel (A). FCRL4 expression on CD27<sup>-</sup>, CD27<sup>+</sup>, CD27<sup>+</sup>CD21<sup>low</sup>, and CD27<sup>+</sup>CD21<sup>high</sup> G6<sup>+</sup> and G6<sup>-</sup> B cell subsets (B).

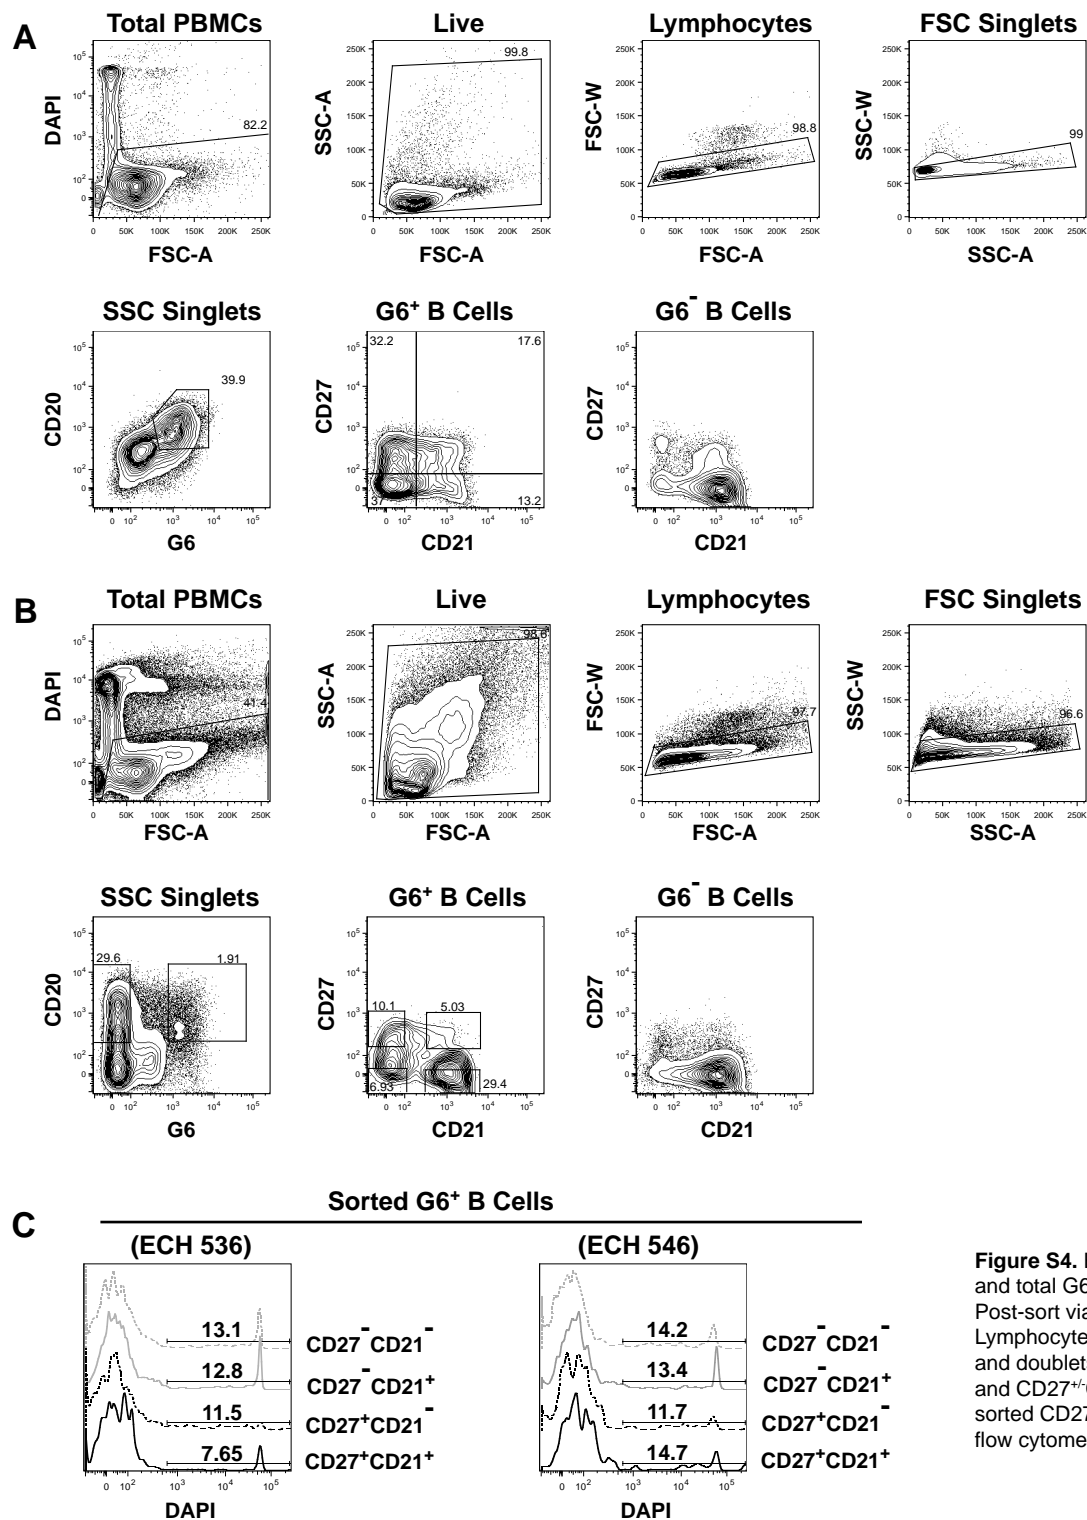

Supplement: supp_blood-2010-10-312942_Document1.pdf [file supp_blood-2010-10-312942_Document1.pdf]
